# Supplementary material
Source: PubMed Central journal article supplement (PMC4934843)
Supplement: CJN.10441015SupplementaryData.pdf [file CJN.10441015SupplementaryData.pdf]

# Supplemental Material

**Supplemental Table 1.** Coefficient of variation (CV) for assays of biomarkers.

| <b>Biomarkers</b>                 | <b>Intra-assay CV</b> | <b>Inter-assay CV</b> |
|-----------------------------------|-----------------------|-----------------------|
| Albumin (g/dL)                    | 3% - 4%               | NA                    |
| Ferritin (ng/ml)                  | 6%                    | NA                    |
| hsCRP (mg/L)                      | 5% (4% - 6%)          | 6% (4% - 10%)         |
| IGF-1 ( $\mu\text{g}/\text{ml}$ ) | 4.3% (3% - 4.5%)      | 6.9% (6% - 8%)        |
| IL-6 (pg/ml)                      | 4% (3% - 6%)          | 5% (5% - 8%)          |
| Orosomuroid (g/L)                 | 5% - 7%               | NA                    |
| sICAM-1 (ng/ml)                   | 4% (3% - 5%)          | 5% (4% - 7%)          |
| sVCAM-1 (ng/ml)                   | 3.5% (2% - 4%)        | 6% (5% - 8%)          |
| TNF (pg/ml)                       | 8% - 10%              | 5% (4% - 7%)          |
| TnT ( $\mu\text{g}/\text{L}$ )    | 8%                    | NA                    |
| PLT ( $10^3/\mu\text{l}$ )        | 5% - 7%               | NA                    |
| WBC ( $10^3/\mu\text{l}$ )        | 6%                    | NA                    |

Abbreviations: hsCRP, high-sensitivity C-reactive protein; IGF-1, insulin-like growth factor 1; IL-6, interleukin 6; sICAM-1, soluble intracellular adhesion molecule 1; sVCAM-1, soluble vascular cellular adhesion molecule 1; TNF, tumor necrosis factor  $\alpha$ ; PLT, platelet count ; TnT, troponin T; WBC, white blood cell count.

NA, not assessed: Inter-assay CVs were in general not available for those biomarkers that were analyzed in the clinical chemistry laboratory at Karolinska University Hospital.

**Supplemental Table 2.** Causes of 149 deaths during 60 months' follow-up in 543 chronic kidney disease stage 5 patients starting on dialysis.

| <b>Causes of death</b>                               | <b>N (% of total)</b> |
|------------------------------------------------------|-----------------------|
| <b>Cardiovascular related deaths<sup>a</sup></b>     | 81 (54%)              |
| <b>Non-cardiovascular related deaths<sup>a</sup></b> | 68 (46%)              |
| Infectious complications                             | 25 (17%)              |
| Malignancies                                         | 10 (7%)               |
| Withdrawal from treatment/dementia/ cachexia         | 15 (10%)              |
| Cause of death uncertain                             | 18 (12%)              |
| <b>Total deaths</b>                                  | <b>149 (100%)</b>     |

<sup>a</sup> Values are presented as number of patients who died and in bracket the corresponding percentage.

**Supplemental Table 3:** Correlation matrix (Spearman's rank correlation) coefficient showing associations between investigated biomarkers (except serum albumin) in 543 chronic kidney disease stage 5 patients starting on dialysis.

| <b>Biomarker</b>                           | <b>Ferritin</b><br>(ng/ml;<br>n=531) | <b>IGF-1</b><br>(µg/ml)  | <b>IL-6</b><br>(pg/ml)  | <b>hsCRP</b><br>(mg/L)   | <b>sICAM-1</b><br>(ng/ml) | <b>sVCAM-1</b><br>(ng/ml) | <b>PLT</b><br>(10 <sup>3</sup> /µl) | <b>TNF</b><br>(pg/ml) | <b>TnT</b><br>(µg/L)    | <b>WBC</b><br>(10 <sup>3</sup> /µl) |
|--------------------------------------------|--------------------------------------|--------------------------|-------------------------|--------------------------|---------------------------|---------------------------|-------------------------------------|-----------------------|-------------------------|-------------------------------------|
| <b>IGF-1</b><br>(µg/ml; n=375)             | -0.07                                |                          |                         |                          |                           |                           |                                     |                       |                         |                                     |
| <b>IL-6</b><br>(pg/ml; n=502)              | <b>0.11<sup>a</sup></b>              | <b>-0.20<sup>c</sup></b> |                         |                          |                           |                           |                                     |                       |                         |                                     |
| <b>hsCRP</b><br>(mg/L)                     | <b>0.16<sup>c</sup></b>              | <b>-0.15<sup>b</sup></b> | <b>0.54<sup>c</sup></b> |                          |                           |                           |                                     |                       |                         |                                     |
| <b>sICAM-1</b><br>(ng/ml; n=329)           | 0.03                                 | <b>-0.14<sup>a</sup></b> | <b>0.28<sup>c</sup></b> | <b>0.37<sup>c</sup></b>  |                           |                           |                                     |                       |                         |                                     |
| <b>sVCAM-1</b><br>(ng/ml; n=329)           | <b>0.16<sup>b</sup></b>              | <b>-0.17<sup>b</sup></b> | <b>0.26<sup>c</sup></b> | <b>0.26<sup>c</sup></b>  | <b>0.33<sup>c</sup></b>   |                           |                                     |                       |                         |                                     |
| <b>PLT</b><br>(10 <sup>3</sup> /µl; n=497) | 0.03                                 | -0.10                    | <b>0.09<sup>a</sup></b> | <b>0.210<sup>c</sup></b> | 0.05                      | <b>-0.21<sup>c</sup></b>  |                                     |                       |                         |                                     |
| <b>TNF</b><br>(pg/ml; n=461)               | <b>0.11<sup>a</sup></b>              | -0.07                    | <b>0.17<sup>c</sup></b> | <b>0.16<sup>c</sup></b>  | <b>0.35<sup>c</sup></b>   | <b>0.42<sup>c</sup></b>   | <b>-0.17<sup>c</sup></b>            |                       |                         |                                     |
| <b>TnT</b><br>(µg/L; n=394)                | <b>0.10<sup>a</sup></b>              | <b>-0.20<sup>b</sup></b> | <b>0.29<sup>c</sup></b> | <b>0.23<sup>c</sup></b>  | <b>0.23<sup>c</sup></b>   | <b>0.27<sup>c</sup></b>   | <b>0.15<sup>b</sup></b>             | 0.09                  |                         |                                     |
| <b>WBC</b><br>(10 <sup>3</sup> /µl; n=521) | 0.03                                 | -0.053                   | <b>0.30<sup>c</sup></b> | <b>0.41<sup>c</sup></b>  | <b>0.15<sup>a</sup></b>   | -0.01                     | <b>0.48<sup>c</sup></b>             | -0.05                 | <b>0.12<sup>a</sup></b> |                                     |

|                                    |      |      |                         |                         |                         |      |                         |                         |                         |                         |
|------------------------------------|------|------|-------------------------|-------------------------|-------------------------|------|-------------------------|-------------------------|-------------------------|-------------------------|
| <b>Orosomuroid</b><br>(g/L; n=393) | 0.10 | 0.06 | <b>0.42<sup>c</sup></b> | <b>0.65<sup>c</sup></b> | <b>0.40<sup>c</sup></b> | 0.07 | <b>0.17<sup>c</sup></b> | <b>0.19<sup>c</sup></b> | <b>0.11<sup>a</sup></b> | <b>0.35<sup>c</sup></b> |
|------------------------------------|------|------|-------------------------|-------------------------|-------------------------|------|-------------------------|-------------------------|-------------------------|-------------------------|

a: p<0.05, b: p<0.01, c: p<0.001.

Abbreviations: high-sensitivity C-reactive protein (hsCRP); insulin-like growth factor 1 (IGF-1); interleukin 6 (IL-6); soluble intracellular adhesion molecule (sIVAM-1); soluble vascular cellular adhesion molecule 1 (sVCAM-1); tumor necrosis factor (TNF); platelet count (PLT); troponin T (TnT); WBC (white blood cell).

**Supplemental Table 4.** Comparison of circulating biomarkers by etiology of renal disease in chronic kidney disease stage 5 patients (n=543).

| <b>Biomarkers</b>                          | <b>CGN<br/>(n=126)</b> | <b>DM<br/>(n=159)</b> | <b>HT/RVD<br/>(n=113)</b> | <b>Others<br/>(n=145)</b> | <b>P value</b>   |
|--------------------------------------------|------------------------|-----------------------|---------------------------|---------------------------|------------------|
| <b>Albumin</b><br>(g/dL; n=543)            | 3.4<br>(2.8 – 4.1)     | 3.1<br>(2.2 – 3.8)    | 3.1<br>(2.7 – 4.0)        | 3.5<br>(2.7 – 4.1)        | <b>&lt;0.001</b> |
| <b>Ferritin</b><br>(ng/ml; n=531)          | 117<br>(29 - 263)      | 116<br>(38 - 270)     | 140<br>(32 - 336)         | 134<br>(44 – 368)         | 0.11             |
| <b>hsCRP</b><br>(mg/L; n=543)              | 3.5<br>(0.6 – 18.9)    | 6.3<br>(0.6 – 31.0)   | 6.7<br>(1.1 – 56.0)       | 3.7<br>(0.6 – 26.3)       | <b>0.005</b>     |
| <b>IGF-1</b><br>(µg /ml; n=375)            | 200<br>(82 - 361)      | 136<br>(61 - 264)     | 187<br>(90 - 340)         | 181<br>(90 - 365)         | <b>&lt;0.001</b> |
| <b>IL-6</b><br>(pg/ml; n=502)              | 4.5<br>(1.7 – 11.9)    | 7.3<br>(2.6 – 22.0)   | 6.7<br>(2.4 – 18.4)       | 5.8<br>(1.9 – 16.4)       | <b>&lt;0.001</b> |
| <b>Orosomuroid</b><br>(g/L; n=393)         | 1.1<br>(0.7 – 1.7)     | 1.0<br>(0.6 – 1.6)    | 1.2<br>(0.8 – 2.1)        | 1.1<br>(0.8 – 1.6)        | <b>&lt;0.001</b> |
| <b>sICAM-1</b><br>(ng/ml; n=329)           | 244<br>(168 - 313)     | 247<br>(187 - 473)    | 248<br>(167 - 385)        | 240<br>(162 - 362)        | 0.20             |
| <b>sVCAM-1</b><br>(ng/ml; n=329)           | 1144<br>(801 - 1707)   | 1420<br>(899 - 2229)  | 1322<br>(863 - 2041)      | 1275<br>(752 - 1900)      | <b>0.005</b>     |
| <b>PLT</b><br>(10 <sup>3</sup> /µl; n=497) | 237<br>(147 - 345)     | 280<br>(171 - 403)    | 271<br>(163 - 391)        | 234<br>(134 - 349)        | <b>&lt;0.001</b> |
| <b>TNF</b><br>(pg/ml; n=461)               | 10.8<br>(6.9 – 20.0)   | 12.5<br>(6.7 – 21.3)  | 12.8<br>(8.0 – 22.0)      | 12.3<br>(7.3 – 22.8)      | <b>0.02</b>      |
| <b>TnT</b><br>(µg/L; n=394)                | 0.03<br>(0.01 – 0.13)  | 0.11<br>(0.02 – 0.39) | 0.04<br>(0.01 – 0.14)     | 0.02<br>(0.01 – 0.10)     | <b>&lt;0.001</b> |
| <b>WBC</b><br>(10 <sup>3</sup> /µl; n=521) | 7.6<br>(5.5 – 11.2)    | 8.0<br>(5.2 – 12.3)   | 8.3<br>(5.2 – 12.4)       | 6.4<br>(4.5 – 9.9)        | <b>&lt;0.001</b> |

Data presented as median (range of 10th - 90th percentile) concentration of biomarkers.

Abbreviations: CGN, chronic glomerulonephritis; DM, diabetes mellitus; HT/RVD, hypertension/renal vascular disease; hsCRP; high-sensitivity C-reactive protein; IGF-1, insulin-like growth factor 1; IL-6, interleukin 6; sICAM-1, soluble intracellular adhesion molecule (sIVAM-1); sVCAM-1, soluble vascular cellular adhesion molecule 1; PLT; platelet count count; TNF, tumor necrosis factor; TnT, troponin T; WBC, white blood cell count.

**Supplemental Table 5.** All-cause mortality with baseline cardiovascular disease (CVD) included as variable. Hazard ratios (95% confidence interval, CI) for all-cause mortality over 60 months' follow-up for demographic and clinical parameters, and for each evaluated biomarker, adjusted for all other variables included in the table.

| <b>Variables</b>                                            | <b>Hazard Ratio (95% CI)</b> | <b>P value</b>   |
|-------------------------------------------------------------|------------------------------|------------------|
| Age ( <i>above vs below 59 years</i> )                      | 1.43 (1.00 - 2.07)           | 0.06             |
| Gender ( <i>male vs female</i> )                            | 0.97 (0.67- 1.41)            | 0.87             |
| <b>CVD (<i>present vs absent</i>)</b>                       | <b>1.55 (1.06 – 2.29)</b>    | <b>0.03</b>      |
| <b>Diabetes mellitus (<i>present vs absent</i>)</b>         | <b>1.51 (1.03 – 2.22)</b>    | <b>0.03</b>      |
| Smoking ( <i>yes vs no</i> )                                | 1.26 (0.83 - 1.89)           | 0.28             |
| <b>SGA (<i>malnourished vs well nourished</i>)</b>          | <b>2.33 (1.59 – 3.41)</b>    | <b>&lt;0.001</b> |
| eGFR ( <i>below vs above 6.9 ml/min/1.73m<sup>2</sup></i> ) | 1.45 (1.01 – 2.07)           | 0.05             |
| Calendar year period ( <i>2010 – 2014 vs 2006 - 2009</i> )  | 1.18 (0.59 – 2.33)           | 0.64             |
| Calendar year period ( <i>2010 – 2014 vs 2000 - 2005</i> )  | 0.90 (0.45 – 1.79)           | 0.75             |
| Calendar year period ( <i>2010 – 2014 vs 1994 - 1999</i> )  | 0.81 (0.38 – 1.72)           | 0.58             |
| <b>WBC (<i>above vs below 8.0×10<sup>3</sup>/μl</i>)</b>    | <b>1.78 (1.23 – 2.57)</b>    | <b>0.002</b>     |
| <b>IL-6 (<i>above vs below 6.7 pg/ml</i>)</b>               | <b>1.74 (1.16 - 2.61)</b>    | <b>0.008</b>     |
| TnT ( <i>above vs below 0.06 μg/L</i> )                     | 1.31 (0.89 – 1.91)           | 0.17             |
| hsCRP ( <i>above vs below 6.4 mg/L</i> )                    | 1.25 (0.80 – 1.95)           | 0.42             |
| Albumin ( <i>below vs above 3.3 g/dL</i> )                  | 1.21 (0.85 – 1.73)           | 0.59             |
| PLT ( <i>above vs below 261×10<sup>3</sup>/μl l</i> )       | 1.17 (0.81 – 1.70)           | 0.40             |
| sVCAM-1 ( <i>above vs below 1356 ng/ml</i> )                | 1.13 (0.75 – 1.71)           | 0.55             |
| Ferritin ( <i>above vs below 122 ng/ml</i> )                | 1.08 (0.77 – 1.52)           | 0.66             |
| sICAM-1 ( <i>above vs below 249 ng/ml</i> )                 | 1.06 (0.76 – 1.48)           | 0.72             |
| IGF-1 ( <i>above vs below 155 μg/ml</i> )                   | 0.93 (0.64 - 1.37)           | 0.72             |
| <b>TNF (<i>above vs below 12.1 pg/ml</i>)</b>               | <b>0.63 (0.42 – 0.94)</b>    | <b>0.02</b>      |
| <b>Orosomuroid (<i>above vs below 1.1 g/L</i>)</b>          | <b>0.58 (0.39 – 0.86)</b>    | <b>0.006</b>     |

Abbreviations: estimated glomerular filter rate (eGFR); high-sensitivity C-reactive protein (hsCRP); insulin-like growth factor 1 (IGF-1); interleukin 6 (IL-6); SGA (Subjective global assessment of nutritional status); soluble intracellular adhesion molecule (sIVAM-1); soluble vascular cellular adhesion molecule 1 (sVCAM-1); tumor necrosis factor (TNF); platelet count (PLT); troponin T (TnT); WBC (white blood cell).

**Supplemental Figure 1.**

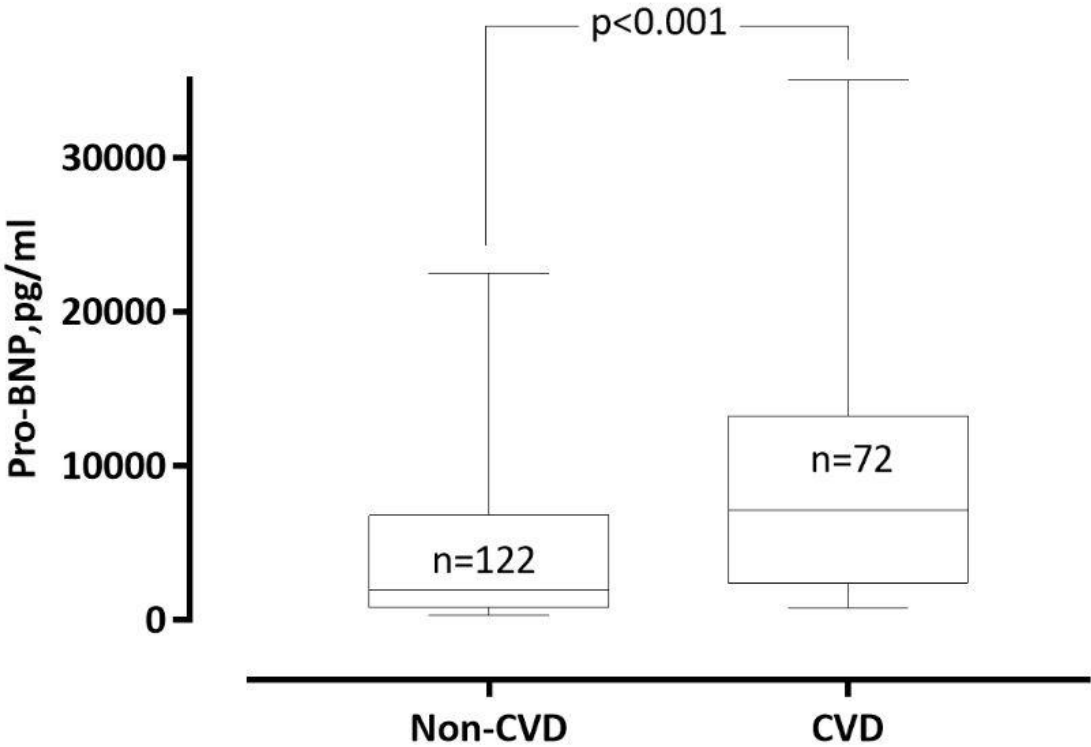

N-terminal pro-brain natriuretic peptide (NTpro-BNP) in 194 patients with or without cardiovascular disease (CVD).
